# Supplementary material for: Pedestrian Safety in Road Traffic in the Era of the SARS-CoV-2 Pandemic in the Example of Szczecin
Source: MDPI journal article supplement (doi:10.3390/su151411000), 2023-07-13
Supplement: s1 [file s1]

Road traffic safety and mobility of the inhabitants of Szczecin and the surrounding communes

Ladies and Gentlemen,

We kindly ask you to complete the following questionnaire, the purpose of which is to obtain information on the mobility of residents of the Szczecin agglomeration. The research results will be used for scientific purposes. The survey is completely anonymous.

We thank you in advance for your time,

**Identification details**

What is your gender?

- ☐ Male  
☐ Female

What is your age?

- ☐ <18  
☐ 18-24  
☐ 25-34  
☐ 35-45  
☐ 46-55  
☐ >65

Please tick the municipality where you live:

- ☐ Szczecin  
☐ Dobra  
☐ Police  
☐ Kolbaskowo  
☐ Goleniow  
☐ Stare Czarnowo  
☐ Kobylanka  
☐ Stargard  
☐ Pyrzyce  
☐ Gryfino  
☐ Other: .....

The preferred means of transport in the area of the Szczecin agglomeration **before** the Covid-19 pandemic:

- ☐ Individual vehicle  
☐ Taxi/uber/other  
☐ Public transport  
☐ Motorcycle  
☐ Bike/scooter  
☐ On foot

What factors guided your choice of means of transport **before** the Covid-19 pandemic? (Please select up to 3 answers)

- ☐ Cost  
☐ Principles of sustainable development/ecology  
☐ Transport congestion  
☐ Own travel comfort  
☐ Safety of the chosen means of transport  
☐ Time  
☐ Other: .....

The preferred means of transport in the area of the Szczecin agglomeration **during** the introduced movement restrictions caused by the Covid-19 pandemic:

- ☐ My transportation preferences have not changed  
☐ Individual vehicle  
☐ Taxi/uber/other  
☐ Public transport  
☐ Motorcycle  
☐ Bike/scooter  
☐ On foot

What factors guided your choice of means of transport **during** the introduced movement restrictions caused by the Covid-19 pandemic? (Please select up to 3 answers)

- ☐Cost
- ☐Principles of sustainable development/ecology
- ☐Transport congestion
- ☐Own travel comfort
- ☐Safety of the chosen means of transport
- ☐Safety related to the spread of the pandemic
- ☐Time
- ☐Other: .....

The preferred means of transport in the area of the Szczecin agglomeration **after** the end of movement restrictions caused by the Covid-19 pandemic:

- ☐My transportation preferences have not changed
- ☐Individual vehicle
- ☐Taxi/uber/other
- ☐Public transport
- ☐Motorcycle
- ☐Bike/scooter
- ☐On foot

What factors guided your choice of means of transport **after** the end of the movement restrictions caused by the Covid-19 pandemic? (Please select up to 3 answers)

- ☐Cost
- ☐Principles of sustainable development/ecology
- ☐Transport congestion
- ☐Own travel comfort
- ☐Safety of the chosen means of transport
- ☐Safety related to the spread of the pandemic
- ☐Time
- ☐Other: .....

In your opinion, has road safety improved in the area of the Szczecin agglomeration **during** the introduced movement restrictions caused by the Covid-19 pandemic?

- ☐Yes
- ☐No

Have you observed an increased number of dangerous traffic situations in the area of the Szczecin agglomeration with the participation of VRU (pedestrian/cyclist)-driver **during** the introduced restrictions related to Covid-19, if so, what were they about?

- ☐Yes, non-compliance with traffic rules by pedestrians
- ☐Yes, non-compliance with traffic regulations by vehicle drivers
- ☐Yes, non-compliance with traffic regulations by cyclists/scooters
- ☐No
- ☐Other: .....

Have you witnessed dangerous behaviour of drivers in the area of the Szczecin agglomeration **during** the introduced restrictions on movement caused by the Covid-19 pandemic, if so, what were they about? (Please select up to 3 answers)

- ☐Yes, failure to give right of way
- ☐Yes, speed not adapted to traffic conditions (traffic jams, weather conditions)
- ☐Yes, non-compliance with speed limits
- ☐Yes, failure to keep a safe distance between vehicles
- ☐Yes, incorrect manoeuvres in road traffic (overtaking, passing, reversing, etc.)
- ☐Yes, failure to give way to pedestrian
- ☐Yes, failure to comply with the traffic lights
- ☐Yes, driving without required lighting
- ☐Yes, non-observance of other signs and signals
- ☐I wasn't
- ☐Others: .....

Have you witnessed dangerous pedestrian behaviour in the area of the Szczecin agglomeration **during** the introduced restrictions on movement caused by the Covid-19 pandemic, if so, what were they about?

☐ Yes, careless entry onto the road (e.g. from behind a vehicle, in front of a moving vehicle)

☐ Yes, failure to comply with the traffic lights

☐ Yes, crossing the road in a prohibited place

☐ I have not witnessed dangerous pedestrian behaviours

☐ Other: .....
