# Supplementary material for: Pedestrian Safety in Road Traffic in the Era of the SARS-CoV-2 Pandemic in the Example of Szczecin
Source: MDPI journal article supplement (doi:10.3390/su151411000), 2023-07-13
Supplement: s1 [file s1]

Archive with 1 entries (1 files):
- sustainability-2452398-supplementary.pdf
